# Supplementary material for: Bioremediation of cadmium-contaminated paddy soil using an autotrophic and heterotrophic mixture
Source: Royal Society of Chemistry journal article supplement (doi:10.1039/d0ra03935g), 2020-01-01
Supplement: d0ra03935g1.pdf [file d0ra03935g1.pdf]

## **Bioremediation of cadmium-contaminated paddy soil using an autotrophic and heterotrophic mixture**

Menglong Xu<sup>a,b,c,#</sup>, Yazi Liu<sup>a,c,#</sup>, Yan Deng<sup>a,b,c</sup>, Siyuan Zhang<sup>a,b,c</sup>, Xiaodong Hao<sup>a,b,c</sup>,  
Ping Zhu<sup>a,b,c</sup>, Jieyi Zhou<sup>a,c</sup>, Huaqun Yin<sup>a,c</sup>, Yili Liang<sup>a,c</sup>, Hongwei Liu<sup>a,c</sup>, Xueduan  
Liu<sup>a,c</sup>, Lianyang Bai<sup>b</sup>, Luhua Jiang<sup>a,c,\*\*</sup>, Huidan Jiang<sup>b,\*</sup>

# These authors equally contributed to this work.

\* Corresponding author.

\*\* Corresponding author at: School of Minerals Processing and Bioengineering, Central  
South University, Changsha 410083, China.

E-mail addresses: [xumenglong@csu.edu.cn](mailto:xumenglong@csu.edu.cn) (M. Xu), [huidanjiang@csu.edu.cn](mailto:huidanjiang@csu.edu.cn) (H.  
Jiang), [jiangluhua@csu.edu.cn](mailto:jiangluhua@csu.edu.cn) (L. Jiang)

<sup>a</sup> *School of Minerals Processing and Bioengineering, Central South University,  
Changsha 410083, China*

<sup>b</sup> *Hunan Biotechnology Research Institute, Hunan Academy of Agricultural Sciences,  
Changsha 410125, China*

<sup>c</sup> *Key Laboratory of Biometallurgy of Ministry of Education, Changsha 410083, China*

## **SM: Materials and methods**

### Isolation and characterizations of heterotrophic isolates

High throughput sequencing technology was used to further identification of the 7 isolates. Total genomic DNA was extracted with HP Fungal DNA Kit (OMEGA) by reported methods.<sup>1</sup> Internal transcribed spacer (ITS) sequences were amplified by using primer pairs ITS4R(5'-TCCTCCGCTTATTGATATGC-3') and forward primers ITS7F (5'-GTGARTCATCGARTCTTTG-3'). The GTGARTCATCGARTCTTTG-3'). The polymerase chain reaction (PCR) amplification procedures were performed as follows: initial denaturation at 94 °C for 5 min, followed by 35 cycles of 94 °C for 45 s, 62 °C for 45 s and 72 °C for 30 s, with final extension at 72 °C for 10 min<sup>2, 3</sup>. PCR products were quantified and purified by electrophoresis on agarose gel (1.0%) and purified using E.Z.N.A. DNA Gel Extraction KIT (OMEGA). The sequencing process was performed at Sangon Biotech (Shanghai) Co., Ltd.

### Analysis of community succession in agitating bioleaching

The soil slurry was then centrifuged at 10000×g for 5 minutes. Subsequently, the total genomic DNA of soils was extracted using Fast DNA® SPIN Kit for Soil (MP Biomedicals Inc., USA) according to the instruction. The quality of DNA was examined according to the reported methods <sup>4</sup>. The V4 region of 16S ribosomal RNA (rRNA) was amplified by PCR using primers 515F(5'-GTGCCAGCMGCCGCGGTAA-3') and 806R(5'-GTGCCAGCMGCCGCGGTAA-3') combined with unique Illumina adapter sequences <sup>5</sup>. PCR products were purified by aforementioned methods and the 16S DNA sequencing process was performed on Illumina MiSeq sequencing platform of *Key Laboratory of Biometallurgy of Ministry of Education*.

## SM: Tables

Table S1 Growth conditions of 7 acid leaching strains

| Strains                  | Energy source     | Temperature /°C | pH  |
|--------------------------|-------------------|-----------------|-----|
| <i>A.caldus</i> DX       | S                 | 45              | 2.0 |
| <i>A.thiooxidans</i> AO1 | S                 | 30              | 2.0 |
| <i>Athiooxidans</i> ZJ   | S                 | 30              | 2.0 |
| <i>L.ferriphilum</i> DX  | FeSO <sub>4</sub> | 40              | 1.6 |
| <i>A. thiooxidans</i> DX | S                 | 30              | 2.0 |
| <i>A. caldus</i> S1      | S                 | 45              | 2.0 |
| <i>F. acidiphilum</i> DX | FeSO <sub>4</sub> | 45              | 1.0 |

Table S2 Alpha-diversity indexes of soils using different treatments on day 4.

| Item        | Shannon index | Simpson index | Evenness     | OTU Number <sup>a</sup> |
|-------------|---------------|---------------|--------------|-------------------------|
| Origin Soil | 3.7±0.05 a    | 0.75±0 a      | 0.5±0 a      | 1597±38 a               |
| CK          | 3.1±0.18 ab   | 0.74±0 a      | 0.44±0.02 ab | 1225±118 bc             |
| 9K Control  | 3.2±0.19 ab   | 0.73±0.01 a   | 0.44±0.02 ab | 1378±54 ab              |
| Att-sys     | 2.9±0.3 b     | 0.73±0.01 a   | 0.41±0.04 bc | 1023±136 c              |
| Htt-sys     | 1.8±0.07 c    | 0.69±0.01 b   | 0.36±0.01 c  | 176±22 d                |
| Co-sys      | 3.1±0.21 b    | 0.74±0 a      | 0.44±0.02 ab | 1074±97 c               |

<sup>a</sup> Mean ± standard deviation (n = 3). Means within a column followed by the same letter are not significantly different according to the LSD test ( $P>0.05$ ). The indexes were calculated from OTU relative abundance of each replicate

# SM: Figures

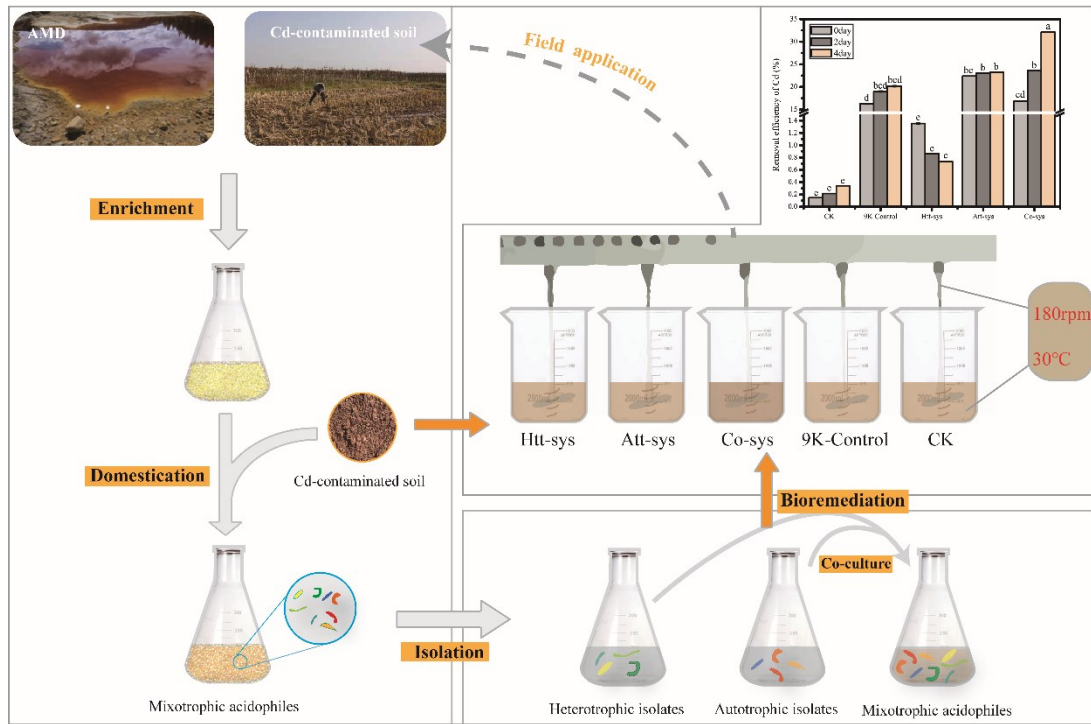

Fig. S1 Graphic Abstract of the experimental process in this paper

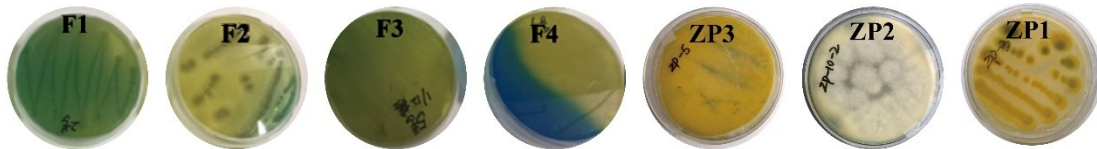

Fig. S2 The growth of 7 isolates on plates with bromocresol green indicator

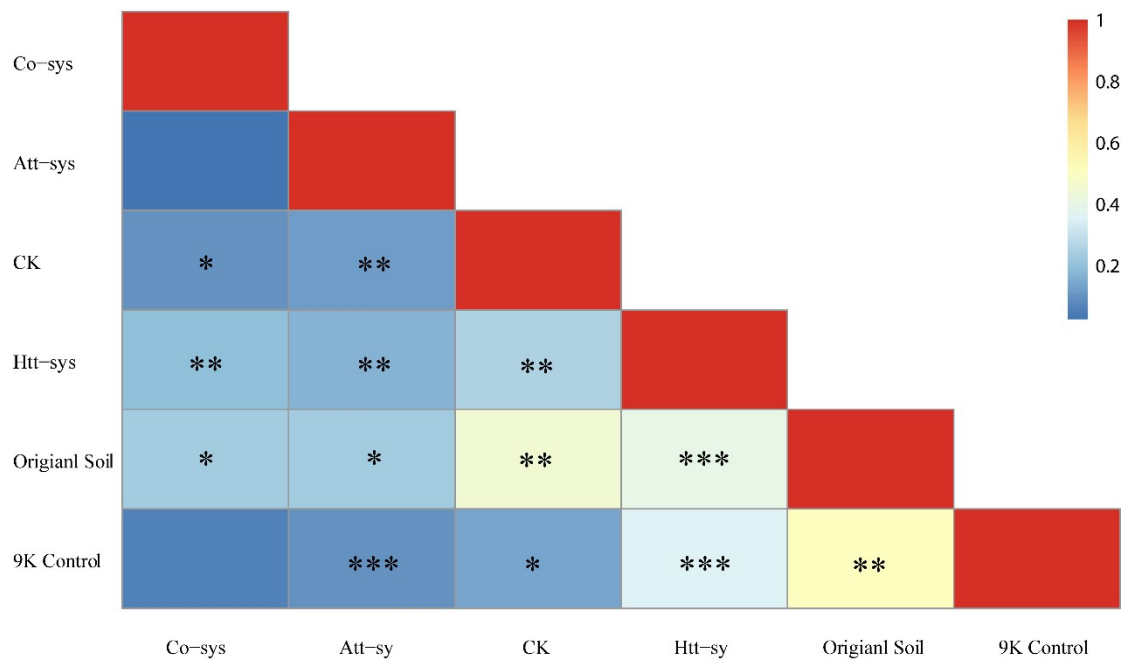

Fig. S3 PerMANOVA using distance matrices, “\*” means  $p < 0.05$ , “\*\*” means  $p < 0.01$  and “\*\*\*” mean  $p < 0.001$ .

## Reference

1. Z. Wei-min, W. Chang-bin, Z. Ru-bing, H. Pei-lei, Q. Guan-zhou, G. Guo-hua and Z. Hong-bo, *Transactions of Nonferrous Metals Society of China*, 2009, **019**, 222-227.
2. X. Hao, P. Zhu, H. Zhang, Y. Liang, H. Yin, X. Liu, L. Bai, H. Liu and H. Jiang, *Sci Total Environ*, 2019, **655**, 347-355.
3. Y. H. Xiao, X. D. Liu, H. Q. Yin, W. L. Dong, Y. L. Liang, L. Y. Ma and G. Z. Qiu, *Advanced Materials Research*, 2015, **1130**, 454-458.
4. L. Ma, X. Wang, X. Feng, Y. Liang, Y. Xiao, X. Hao, H. Yin, H. Liu and X. Liu, *Bioresource Technology*, 2017, **223**, 121-130.
5. J. Tao, X. Liu, Y. Liang, J. Niu, Y. Xiao, Y. Gu, L. Ma, D. Meng, Y. Zhang, W. Huang, D. Peng and H. Yin, *Appl Microbiol Biotechnol*, 2017, **101**, 1289-1299.
